# Supplementary material for: Capacity of Health Facilities to Manage Hypertension in Mukono and Buikwe Districts in Uganda: Challenges and Recommendations
Source: PLOS journal article supplement (doi:10.1371/journal.pone.0142312), 2015-11-11
Supplement: S1 (10.1371/journal.pone.0142312.s001) [file journal.pone.0142312.s001]

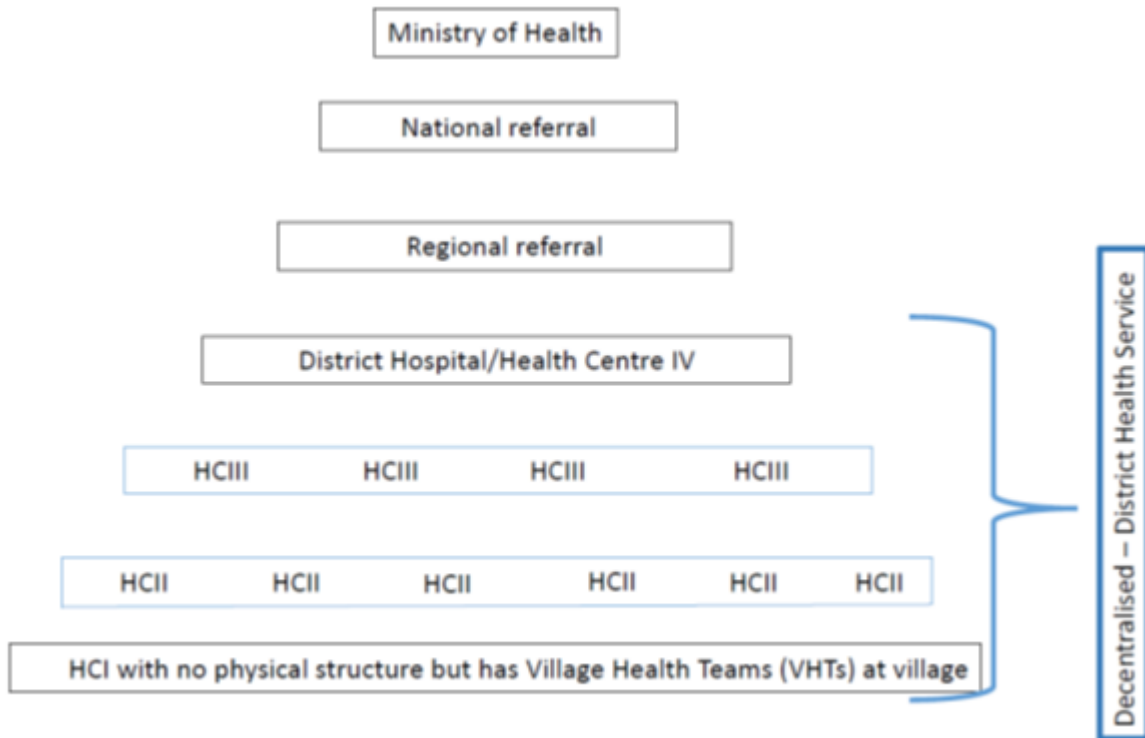

S1 Figure: illustrates the Health care delivery and referral system in Uganda
